# Supplementary material for: A high performance fully bio-based epoxy thermoset from a syringaldehyde-derived epoxy monomer cured by furan-derived amine
Source: Royal Society of Chemistry journal article supplement (doi:10.1039/d0gc03451g), 2020-11-26
Supplement: d0gc03451g1.pdf [file d0gc03451g1.pdf]

*Electronic Supplementary Information for*

**High performance fully bio-based epoxy thermoset from syringaldehyde-derived epoxy monomer cured by furan-derived amine**

Hafezeh Nabipour,<sup>a</sup> Xin Wang,<sup>a\*</sup> Lei Song<sup>a</sup> and Yuan Hu<sup>a\*</sup>

<sup>a</sup>State Key Laboratory of Fire Science, University of Science and Technology of China, 96

Jinzhai Road, Hefei, Anhui 230026, P. R. China.

\*Corresponding authors. Tel/Fax: +86-551-63601664. E-mail address: yuanhu@ustc.edu.cn (Y. Hu), wxcmx@ustc.edu.cn (X. Wang).

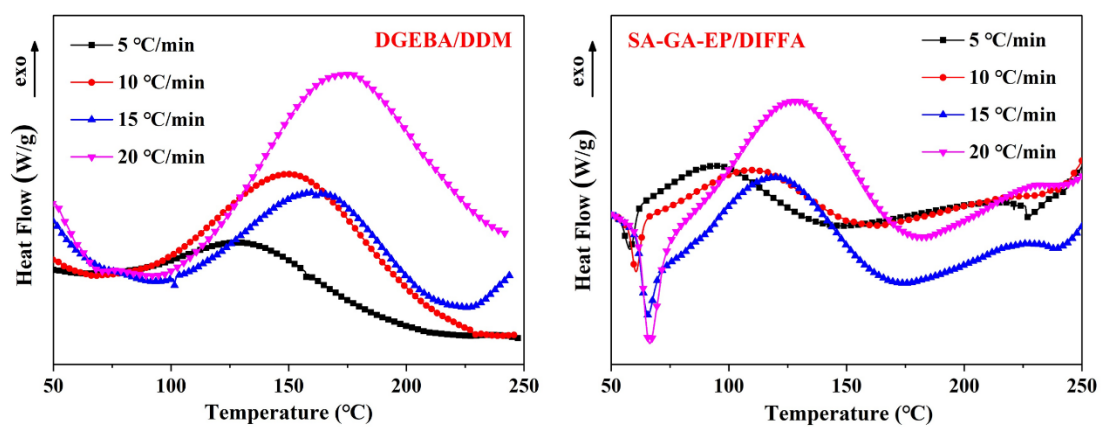

**Fig. S1** DSC thermograms of DGEBA/DDM and SA-GA-EP/DIFFA at various heating rates.

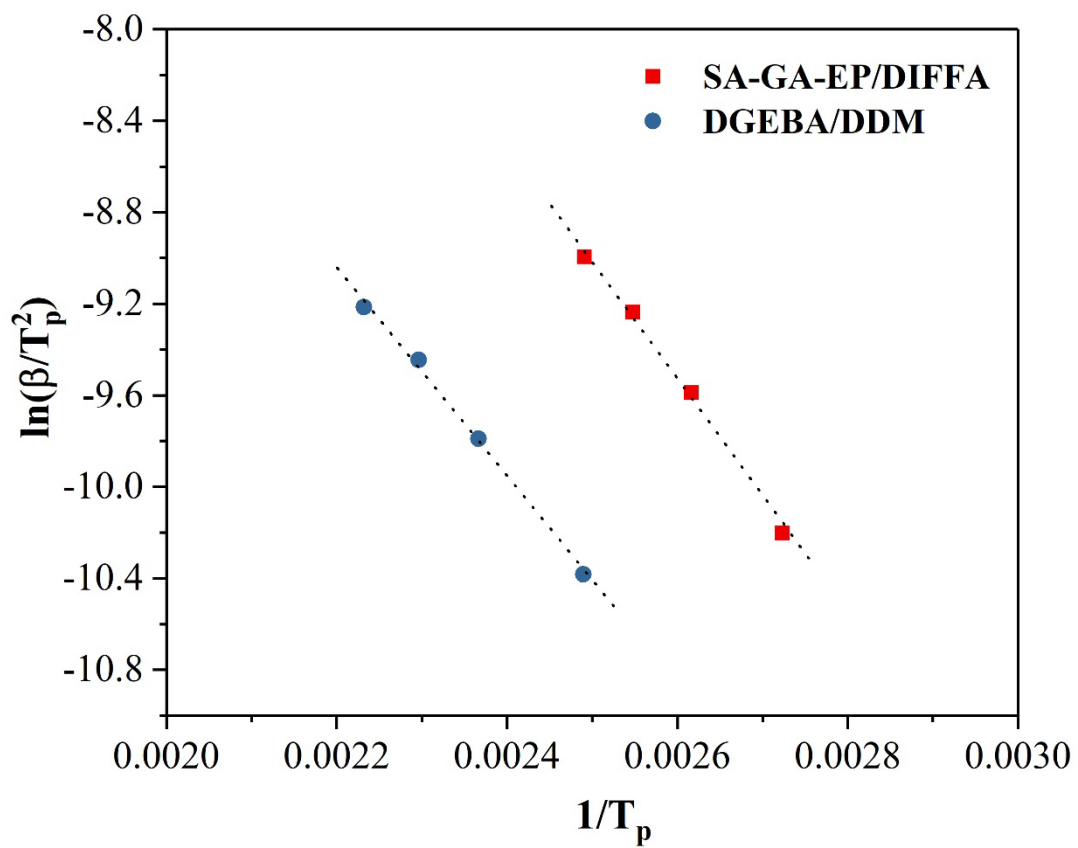

**Fig. S2** Linear plots of  $\ln(\beta/T_p^2)$  as a function of  $1/T_p$  of DGBEA/DDM and SA-GA-EP/DIFFA based on Kissinger's method.

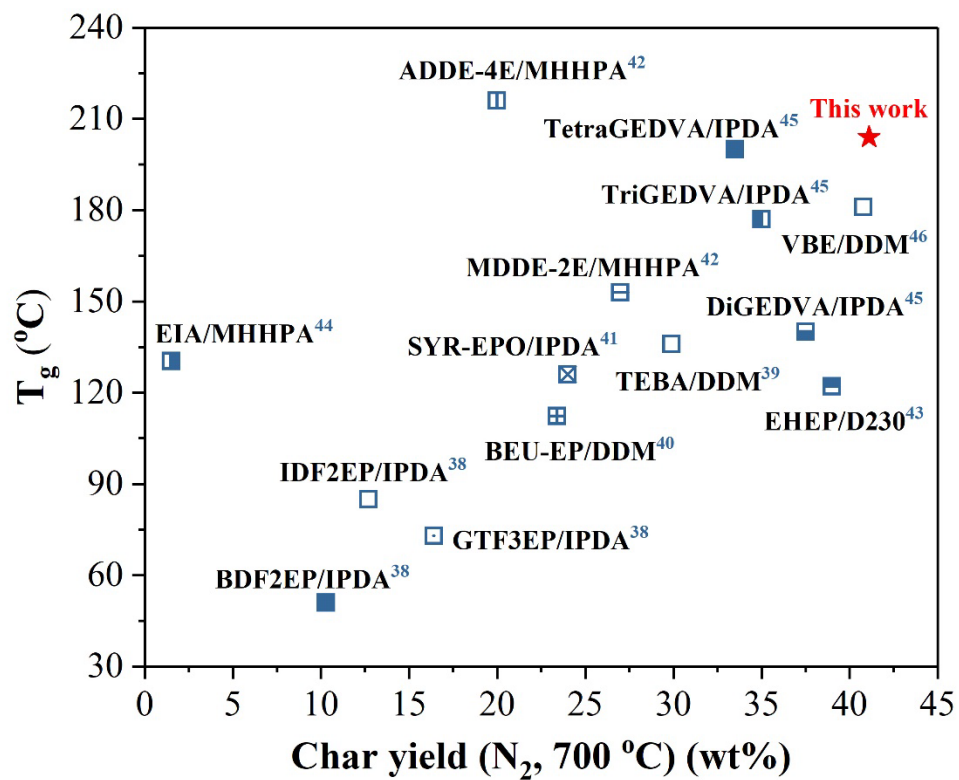

**Fig. S3** Comparison of  $T_g$  and char yield between SA-GA-EP/DIFFA and previously reported results.
